# Supplementary material for: Star-PAP, a poly(A) polymerase, functions as a tumor suppressor in an orthotopic human breast cancer model
Source: PubMed Central journal article supplement (PMC5386448; doi:10.1038/cddis.2016.199), 2017-02-02
Supplement: cddis2016199x2.pdf [file cddis2016199x2.pdf]

**Supplementary Table S1. Sequences of siRNA**

| siRNA        | sequence              |
|--------------|-----------------------|
| siStar-PAP#1 | AACUACGAGCTGCGAGAAA   |
| siStar-PAP#2 | GUGUGUUUGUCAGUGGCUU   |
|              |                       |
| shRNA        | target sequence       |
| shBIK#1      | CCCACTTAAGGAGAACATAA  |
| shBIK#2      | TGGACGGTTTCACCACACTTA |
| shStar-PAP   | AACUACGAGCTGCGAGAAA   |
