# Supplementary material for: Star-PAP, a poly(A) polymerase, functions as a tumor suppressor in an orthotopic human breast cancer model
Source: PubMed Central journal article supplement (PMC5386448; doi:10.1038/cddis.2016.199), 2017-02-02
Supplement: cddis2016199x3.pdf [file cddis2016199x3.pdf]

**Table S2. Sequences of qPCR and RT-PCR primers**

| qPCR primer      | sequence                |
|------------------|-------------------------|
| Star-PAP forward | GAGTTCTTCCCTGGCTGTGT    |
| Star-PAP reverse | AGCGATGGAGATTCTGGAGC    |
| GAPDH forward    | ACGACCACTTTGTCAAGCTCA   |
| GAPDH reverse    | TCTCTCTTCCCTCTTGTGCTCT  |
| BIK forward      | CCCGACCATGGAGGTTCTT     |
| BIK reverse      | TGAGGCTCACGTCCATCTC     |
| CDH1 forward     | CGAGAGCTACACGTTACCG     |
| CDH1 reverse     | GGGTGTCGAGGGAAAAATAGG   |
| CDH2 forward     | CAACGACGGGTTAGTCACCG    |
| CDH2 reverse     | CGGGTGCTGAATTCCCTTGG    |
| FN1 forward      | GAGGAAACCTGCTCCAGTGC    |
| FN1 reverse      | CACGAACATCGGTGAAGGGG    |
| SNAI1 forward    | ATGCACATCCGAAGCCACAC    |
| SNAI1 reverse    | TGCAGTGGGGACAGGAGAAG    |
| SNAI2 forward    | CGGACCCACACATTACCTTGT   |
| SNAI2 reverse    | AAAAAGGCTTCTCCCCCGTG    |
| TWIST1 forward   | GACCTAGATGTCATTGTTCCAGA |
| TWIST1 reverse   | CCCACGCCCTGTTTCTTTGA    |
| VIM forward      | CAACCTGGCCGAGGACATCA    |
| VIM reverse      | CGTGCCAGAGACGCATTGTC    |
|                  |                         |
| RT-PCR primer    | sequence                |
| Star-PAP forward | GAGTTCTTCCCTGGCTGTGT    |
| Star-PAP reverse | AGCGATGGAGATTCTGGAGC    |
| GAPDH forward    | ACGACCACTTTGTCAAGCTCA   |
| GAPDH reverse    | TCTCTCTTCCCTCTTGTGCTCT  |
| BIK forward      | CCCGACCATGGAGGTTCTT     |
| BIK reverse      | TGAGGCTCACGTCCATCTC     |
| HMOX-1 forward   | ATGCCCCAGGATTTGTCAGA    |
| HMOX-1 reverse   | GAAGACTGGGCTCTCCTTGT    |
